# Supplementary material for: Qualitative multi-stakeholder evaluation of the adoption, implementation and sustainment of the school-based dietary intervention “Jump-in”
Source: Springer Nature journal article supplement (doi:10.1186/s12889-024-18814-1), 2024-05-17
Supplement: MOESM1 [file 27104522]

## Additional file 1

### Appendix I COREQ checklist

#### Consolidated criteria for reporting qualitative studies (COREQ): 32-item checklist

| NO                                   | Item                    | Description                                                                                                                                                                                                                          |
|--------------------------------------|-------------------------|--------------------------------------------------------------------------------------------------------------------------------------------------------------------------------------------------------------------------------------|
| <b>Domain 1:</b>                     |                         |                                                                                                                                                                                                                                      |
| <b>Research team and reflexivity</b> |                         |                                                                                                                                                                                                                                      |
| <i>Personal characteristics</i>      |                         |                                                                                                                                                                                                                                      |
| 1.                                   | Interviewer/facilitator | The executive researcher (F.T.) conducted most of the interviews and all focus groups. Interns conducted some of the interviews (V.D., V.T. and S.J.) and data analysis (II) with the help of an executive researcher (F.T. or V.B.) |
| 2.                                   | Credentials             | F.T. = MSc<br>V.D. = BSc<br>V.T. = BSc<br>S.J. = BSc<br>I.I. = MSc<br>V.B. = PhD                                                                                                                                                     |
| 3.                                   | Occupation              | F.T. = PhD student<br>V.D. = MSc student<br>V.T. = MSc student<br>S.J. = MSc student<br>I.I. = MSc student<br>V.B. = senior researcher                                                                                               |
| 4.                                   | Gender                  | F.T. = female<br>V.D. = female<br>V.T. = female<br>S.J. = female<br>I.I. = female<br>V.B. = male                                                                                                                                     |
| 5.                                   | Experience and training | F.T. = MSc degree and professional experience<br>V.D. = MSc training<br>V.T. = MSc training<br>S.J. = MSc training                                                                                                                   |

I.I. = MSc training  
 V.B. = PhD degree and professional  
 experience

---

*Relationship with participants*

---

|    |                                          |                                                                                                                                                                                                                                                           |
|----|------------------------------------------|-----------------------------------------------------------------------------------------------------------------------------------------------------------------------------------------------------------------------------------------------------------|
| 6. | Relationship established                 | Since this is an evaluation study conducted after the initial effectiveness study, we had already established relationships with some actors (HPPs, school principals) but not with others (parents, teachers, children) prior to the study commencement. |
| 7. | Participant knowledge of the interviewer | At the start of the interview the researcher introduced herself with her name, background, occupation and the reason for doing the research.                                                                                                              |
| 8. | Interviewer characteristics              | The executive researcher had no competing interest in the research. The researchers did not state their personal opinions or beliefs during the interviews and focus groups.                                                                              |

---

**Domain 2:  
 study design**

---

*Theoretical framework*

---

|    |                                       |                                                                                    |
|----|---------------------------------------|------------------------------------------------------------------------------------|
| 9. | Methodological orientation and Theory | The study was based on directed content analysis, as described by Hsieh & Shannon. |
|----|---------------------------------------|------------------------------------------------------------------------------------|

---

*Participant selection*

---

|     |                    |                                                                                                                                                                                                                                                                                              |
|-----|--------------------|----------------------------------------------------------------------------------------------------------------------------------------------------------------------------------------------------------------------------------------------------------------------------------------------|
| 10. | Sampling           | HPPs = purposive selection;<br>Jump-in coordinator = purposive selection;<br>School principal = purposive selection;<br>Teachers = convenience selection;<br>Parents = convenience selection;<br>Children = convenience selection                                                            |
| 11. | Method of approach | HPPs: face-to-face, email;<br>Jump-in coordinator: telephone, email;<br>School principal: email, via Jump-in coordinator;<br>Teachers: face-to-face, email, via Jump-in coordinator;<br>Parents: letter, via Jump-in coordinator;<br>Children: face-to-face, letter, via Jump-in coordinator |
| 12. | Sample size        | Total interviewees: 131<br>HPPs: 5                                                                                                                                                                                                                                                           |

---

|                        |                              |                                                                                                                                                                                                                                                                           |
|------------------------|------------------------------|---------------------------------------------------------------------------------------------------------------------------------------------------------------------------------------------------------------------------------------------------------------------------|
|                        |                              | <p>Jump-in coordinators: 7<br/> School principals: 7<br/> Teachers: 20<br/> Parents: 50<br/> Children: 42</p>                                                                                                                                                             |
| 13.                    | Non-participation            | Due to logical constraints one HPP and two principals did not participate. For the same reason, some schools decided not to organize a focus group discussion for parents (n=1) or children (n=3).                                                                        |
| <i>Setting</i>         |                              |                                                                                                                                                                                                                                                                           |
| 14.                    | Setting of data collection   | Primary schools (Jump-in coordinator, school principal, teachers, parents, children). Public Health Service (HPP).                                                                                                                                                        |
| 15.                    | Presence of non-participants | Besides participants and researchers nobody was present, except for occasional disruptions. For example: disruptions by a colleague who had to get something out of the classroom or by principals who checked in for a minute if everything was going well.              |
| 16.                    | Description of sample        | The sample included schools located in disadvantaged neighborhoods of Amsterdam, with ethnic minority groups with a low SES.                                                                                                                                              |
| <i>Data collection</i> |                              |                                                                                                                                                                                                                                                                           |
| 17.                    | Interview guide              | F.T. and V.D. together set up the interview guides. They were not pilot tested, yet adapted iteratively after each interview.                                                                                                                                             |
| 18.                    | Repeat interviews            | No repeat interviews were carried out.                                                                                                                                                                                                                                    |
| 19.                    | Audio/visual recording       | All interviews were audio recorded.                                                                                                                                                                                                                                       |
| 20.                    | Field notes                  | Field notes were made during and after data collection. However, the researchers used interview transcriptions for this paper's analysis.                                                                                                                                 |
| 21.                    | Duration                     | <p>HPP interview: 00:36:13 – 01:33:19 (mean 01:13:36)<br/> Jump-in coordinator interview: 00:25:38 – 01:04:45 (mean 00:42:45)<br/> School principal interview: 0:36:36 – 00:57:17 (mean 00:43:02)<br/> Teachers (group) interview: 00:15:06 – 00:36:38 (mean 0:27:41)</p> |

|                              |                                |                                                                                                                                                                                                                                                                                                                                                                                                           |
|------------------------------|--------------------------------|-----------------------------------------------------------------------------------------------------------------------------------------------------------------------------------------------------------------------------------------------------------------------------------------------------------------------------------------------------------------------------------------------------------|
|                              |                                | Parent focus group discussion: 00:51:38 – 01:28:55 (mean 1:14:26)<br>Child focus group discussion: 00:26:26 – 00:49:12 (mean 00:39:44)                                                                                                                                                                                                                                                                    |
| 22.                          | Data saturation                | Data saturation was discussed and the interview guide was adapted accordingly.                                                                                                                                                                                                                                                                                                                            |
| 23.                          | Transcripts returned           | Transcripts were not returned to participants for comments or corrections.                                                                                                                                                                                                                                                                                                                                |
| <b>Domain 3:</b>             |                                |                                                                                                                                                                                                                                                                                                                                                                                                           |
| <b>Analysis and findings</b> |                                |                                                                                                                                                                                                                                                                                                                                                                                                           |
| <i>Data analysis</i>         |                                |                                                                                                                                                                                                                                                                                                                                                                                                           |
| 24.                          | Number of data coders          | 4 (F.T., S.J., V.D., I.I.)                                                                                                                                                                                                                                                                                                                                                                                |
| 25.                          | Description of the coding tree | The coding tree was based on the framework by Fleuren et al. (2004), see Appendix II.                                                                                                                                                                                                                                                                                                                     |
| 26.                          | Derivation of themes           | The coding tree was guided by the Determinants of innovation model by Fleuren et al. (2004) after open coding the data.<br>When text fragments could not be assigned to the predetermined coding framework during data analysis, additional codes were created. This process was performed independently by one researcher (F.T., V.D., S.J. or I.I) and checked independently by another (F.T. or V.B.). |
| 27.                          | Software                       | MAXQDA 2018                                                                                                                                                                                                                                                                                                                                                                                               |
| 28.                          | Participant checking           | Participants did not provide feedback on the findings.                                                                                                                                                                                                                                                                                                                                                    |
| <i>Reporting</i>             |                                |                                                                                                                                                                                                                                                                                                                                                                                                           |
| 29.                          | Quotations presented           | Participant quotations were presented to illustrate the themes and findings. Quotations were not identified with a participant number.                                                                                                                                                                                                                                                                    |
| 30.                          | Data and findings consistent   | Yes.                                                                                                                                                                                                                                                                                                                                                                                                      |
| 31.                          | Clarity of major themes        | Yes, see results.                                                                                                                                                                                                                                                                                                                                                                                         |
| 32.                          | Clarity of minor themes        | Partially. We emphasized the major themes in the results section.                                                                                                                                                                                                                                                                                                                                         |
