# Supplementary material for: Qualitative multi-stakeholder evaluation of the adoption, implementation and sustainment of the school-based dietary intervention “Jump-in”
Source: Springer Nature journal article supplement (doi:10.1186/s12889-024-18814-1), 2024-05-17
Supplement: MOESM2 [file 27104522]

## Additional file 2

### Appendix II Code system

|                                                                 |
|-----------------------------------------------------------------|
| Background information                                          |
| 1.Satisfaction                                                  |
| 2.Degree of implementation                                      |
| 3. Nice quotes                                                  |
| 4. Dissemination phase                                          |
| 4.1 Socio-political context                                     |
| 4.1a Willingness of parents/child to cooperate                  |
| 4.1b Awareness of health benefits parents/child                 |
| 4.1c Financial burden/benefits of the food policy parents/child |
| 4.1d Innovation fits into existing rules, regulations           |
| 4.1e Perceived responsibility (parents)                         |
| 4.2 Organization level                                          |
| 4.2a Decision making process                                    |
| 4.2b Organizational policies & priorities                       |
| 4.2c Organizational size                                        |
| 4.2d Collaboration with partnerships and networks               |
| 4.2 e Collaboration within organization                         |
| 4.2f Staff turnover (high, average, low)                        |
| 4.2g Staff capacity                                             |
| 4.2h Plans for continuation food policy in the future           |
| 4.3 User level (teacher)                                        |
| 4.3a Support/pressure form colleagues                           |
| 4.3b Support/pressure form director/JI coordinator              |
| 4.3c Knowledge                                                  |
| 4.3d Modeling                                                   |
| 4.3e Self-efficacy                                              |
| 4.3f Ownership/commitment/motivation                            |
| 4.3g Work related stress (enough time)                          |
| 4.3h Intention to continue JI policy                            |
| 4.3i Attitude (eg. ethics, contradictory, goals)                |

|                                                                 |
|-----------------------------------------------------------------|
| 4.3j Perceived responsibility (teacher/school)                  |
| 4.3k (innovation fits in the perceived task orientation)        |
| 4.4 Innovation level                                            |
| 4.4a Clarity procedure/ guidelines of food policy               |
| 4.4a.1 Teachers                                                 |
| 4.4a.2 Parents                                                  |
| 4.4a.3 Children                                                 |
| 4.4b Compatibility with regular tasks and curriculum            |
| 4.4c Extent to which the innovation is appealing to use         |
| 4.4d Relevance of the innovation for children/parents           |
| 4.4e Inclusion-exclusion criteria                               |
| 4.4f (visibility of results)                                    |
| 4.5 Innovation strategy                                         |
| 4.5a Financial resources                                        |
| 4.5a.1 Reimbursement for health professionals                   |
| 4.5b Resources implementing innovation                          |
| 4.5b.1 Workshops parents                                        |
| 4.5b.2 Workshop children                                        |
| 4.5b.3 Workshop teachers                                        |
| 4.5b.4 Materials                                                |
| 4.5b.5 Communication resources (bv. newsletter, app)            |
| 4.5c Administrative support (JI advisor/GGD)                    |
| 4.5d Tailoring Jump-in school                                   |
| 4.5e Opinion leader influences opinions or other organisations  |
| 5. Adoption phase                                               |
| 5.1 Socio-political context                                     |
| 5.1a Willingness of parents/child to cooperate                  |
| parent attitude                                                 |
| Child attitude                                                  |
| 5.1b Awareness of health benefits parents/child                 |
| 5.1c Financial burden/benefits of the food policy parents/child |
| 5.1d Innovation fits into existing rules, regulations           |

|                                                          |
|----------------------------------------------------------|
| 5.1e Perceived responsibility (parents)                  |
| 5.1f Changing society                                    |
| 5.2 Organization level                                   |
| 5.2a Decision making process                             |
| 5.2b Organizational policies & priorities                |
| 5.2c Organizational size                                 |
| 5.2d Collaboration with partnerships and networks        |
| 5.2e Collaboration within organization                   |
| 5.2f Staff turnover (high, average, low)                 |
| 5.2g Staff capacity                                      |
| 5.2h Plans for continuation food policy in the future    |
| 5.3 User level (teacher)                                 |
| 5.3a Support/pressure form colleagues                    |
| 5.3b Support/pressure form director/JI coordinator       |
| 5.3c Knowledge                                           |
| 5.3d Modeling                                            |
| 5.3e Self-efficacy                                       |
| 5.3f Ownership/commitment/motivation                     |
| 5.3g Work related stress (enough time)                   |
| 5.3h Intention to continue JI policy                     |
| 5.3i Attitude (e.g. ethics, contradictory, goals)        |
| 5.3j Perceived responsibility (teacher/school)           |
| 5.3k (innovation fits in the perceived task orientation) |
| 5.3l1 lijn tussen docenten                               |
| 5.4 Innovation level                                     |
| 5.4a Clarity procedure/guidelines of food policy         |
| 5.4a.1 Teachers                                          |
| 5.4a.2 Parents                                           |
| 5.4a.3 Children                                          |
| 5.4b Compatibility with regular tasks and curriculum     |
| 5.4c Extent to which the innovation is appealing to use  |
| 5.4d Relevance of the innovation for children/parents    |

|                                                                 |
|-----------------------------------------------------------------|
| 5.4e Inclusion-exclusion criteria                               |
| 5.4f (visibility of results)                                    |
| 5.5 Innovation strategy                                         |
| 5.5a Financial resources                                        |
| 5.5a1 Reimbursement for health professionals                    |
| 5.5b Resources implementing innovation                          |
| 5.5b.1 Workshops parents                                        |
| 5.5b.2 Workshops teachers                                       |
| 5.5b.3 Workshops children                                       |
| 5.5b.4 Materials                                                |
| 5.5b.5 Communication resources (bv. newsletter, app)            |
| 5.5c Administrative support (JI advisor/GGD)                    |
| 5.5d Tailoring Jump-in school                                   |
| 5.5e Opinion leader influences opinions or other organisations  |
| 6. Implementation phase                                         |
| 6.1 Socio-political context                                     |
| 6.1a Willingness of parents/child to cooperate                  |
| 6.1b Awareness of health benefits parents/child                 |
| 6.1c Financial burden/benefits of the food policy parents/child |
| 6.1d Innovation fits into existing rules, regulations           |
| 6.1e Perceived responsibility (parents)                         |
| 6.1f Changing society                                           |
| 6.2 Organization level                                          |
| 6.2a Decision making process                                    |
| 6.2b Organizational policies & priorities                       |
| 6.2c Organizational size                                        |
| 6.2d Collaboration with partnerships and networks               |
| 6.2e Collaboration with organization                            |
| 6.2f Staff turnover (high, average, low)                        |
| 6.2g Staff capacity                                             |
| 6.2h Plans for continuation food policy in the future           |
| 6.3 User level (teacher)                                        |

|                                                         |
|---------------------------------------------------------|
| 6.3a Support/pressure from colleagues                   |
| 6.3b Support/pressure from director/JI coordinator      |
| 6.3c Knowledge                                          |
| 6.3d Modeling                                           |
| 6.3e Self-efficacy                                      |
| 6.3f Ownership/commitment/motivation                    |
| 6.3g Work related stress (enough time)                  |
| 6.3h Intention to continue JI policy                    |
| 6.3i Attitude (eg. ethics, contradictory, goals)        |
| 6.3j Perceived responsibility (teacher/school)          |
| 6.3k (innovation fits in the perceived task orientation |
| 6.3l 1 lijn tussen docenten                             |
| 6.4 Innovation level                                    |
| 6.4a Clarity procedure/ guidelines of food policy       |
| 6.4a.3 Children                                         |
| 6.4a.2 Parents                                          |
| 6.4a.1 Teachers                                         |
| 6.4b Compatibility with regular tasks and curriculum    |
| 6.4c Extent to which the innovation is appealing to use |
| 6.4d Relevance of the innovation for children/parents   |
| 6.4e Inclusion-exclusion criteria                       |
| 6.4f (Visibility of results)                            |
| 6.5 Innovation strategy                                 |
| 6.5a Financial resources                                |
| 6.5a.1 Reimbursement for health professionals           |
| 6.5b Resources implementing innovation                  |
| 6.5b.1 Workshops parents                                |
| 6.5b.2 Workshops children                               |
| 6.5b.3 Workshops teachers                               |
| 6.5b.4 Materials                                        |
| 6.5b.5 Communication resources (e.g. newsletter, app)   |
| 6.5c Administrative support (HPP/GGD)                   |

|                                                                 |
|-----------------------------------------------------------------|
| 6.5d Tailoring Jump-in school                                   |
| 6.5e Opinion leader influences opinions or other organizations  |
| 7. Continuation phase                                           |
| 7.1 Socio-political context                                     |
| 7.1a Willingness of parents/ child to cooperate                 |
| 7.1b Awareness of health benefits parents/child                 |
| 7.1c Financial burden/benefits of the food policy parents/child |
| 7.1d innovation fits into existing rules, regulations           |
| 7.1e Perceived responsibility (parents)                         |
| 7.1f Changing society                                           |
| 7.2 Organization level                                          |
| 7.2a Decision making process                                    |
| 7.2b Organizational policies & priorities                       |
| 7.2c Organizational size                                        |
| 7.2d Collaboration with partnerships and networks               |
| 7.2e Collaboration within organization                          |
| 7.2f Staff turnover (high, average, low)                        |
| 7.2g Staff capacity                                             |
| 7.2h Plans for continuation food policy in the future           |
| 7.3 User level (teacher)                                        |
| 7.3a Support/pressure from colleagues                           |
| 7.3b Support/pressure from director/JI coordinator              |
| 7.3c Knowledge                                                  |
| 7.3d Modeling                                                   |
| 7.3e Self-efficacy                                              |
| 7.3f Ownership/commitment/motivation                            |
| 7.3g Work related stress (enough time)                          |
| 7.3h Intention to continue JI policy                            |
| 7.3i Attitude (e.g. ethics, contradictory, goals)               |
| 7.3j Perceived responsibility (teacher/school)                  |
| 7.3k (innovation fits in the perceived task orientation)        |
| 7.3l 1 lijn tussen docenten                                     |

|                                                                |
|----------------------------------------------------------------|
| 7.4 Innovation level                                           |
| 7.4a Clarity procedure/ guidelines of food policy              |
| 7.4a.1 Teachers                                                |
| 7.4a. 2 Parents                                                |
| 7.4a. 3 Children                                               |
| 7.4b Compatibility with regular tasks and curriculum           |
| 7.4c Extent to which the innovation is appealing to use        |
| 7.4d Relevance of the innovation for children/parents          |
| 7.4e Inclusion-exclusion criteria                              |
| 7.4f (visibility of results)                                   |
| 7.5 Innovation strategy                                        |
| 7.5a Financial resources                                       |
| 7.5a.1 Reimbursement for health professionals                  |
| 7.5b Resources implementing innovation                         |
| 7.5b.1 Workshops parents                                       |
| 7.5b.2 Workshops children                                      |
| 7.5b.3 Workshops teachers                                      |
| 7.5b.4 Materials                                               |
| 7.5b.5 Communication resources (e.g.. newsletter, app)         |
| 7.5c Administrative support (HPP/GGD)                          |
| 7.5d Tailoring Jump-in school                                  |
| 7.5e Opinion leader influences opinions or other organizations |
